# Supplementary material for: First structurally characterized optically active mononuclear Mn(iv) complex: synthesis, crystal structure and properties of [MnivL2] {H2L = S-(−)-2-[(2-hydroxy-1-phenylethylimino)methyl]phenol}
Source: Royal Society of Chemistry journal article supplement (doi:10.1039/b315658c), 2004-01-01
Supplement: b315658c.pdf [file b315658c.pdf]

# Supplementary Material (ESI) for New Journal of Chemistry  
# This journal is © The Royal Society of Chemistry and  
# The Centre National de la Recherche Scientifique, 2004

## STYRENE EPOXIDATION : GC ANALYSIS (catalyzed by 1)

DETECTOR: FID  
COLUMN: STAINLESS STEEL PACKED COLUMN (5%SE 30, 5m)  
TEMP PROGRAM: 100° C -0min-5 °/min-175° C-5min.  
INJECTOR PORT TEMP: 200° C  
DETECTOR: 300° C  
CARRIER GAS: NITROGEN

### GAS CHROMATOGRAMS OF STANDARD SAMPLES TO DRAW THE CALIBRATION PLOT

A) 50 mg of Styrene oxide + 75 mg of PhBr ( Internal Standard )  
in 10 ml Ether.

CLASS-GC10 Ver.=1.62 SYS=1 Ch=1 REPORT.NO=2 DATA=@CHRM1.D04 04/01/31 08:14:34  
Sample :  
ID :  
Dilution Factor: 1  
Type : Unknown  
Detector : FID  
Operator :

\*\*\* Chromatogram \*\*\* Filename:@CHRM1.C04

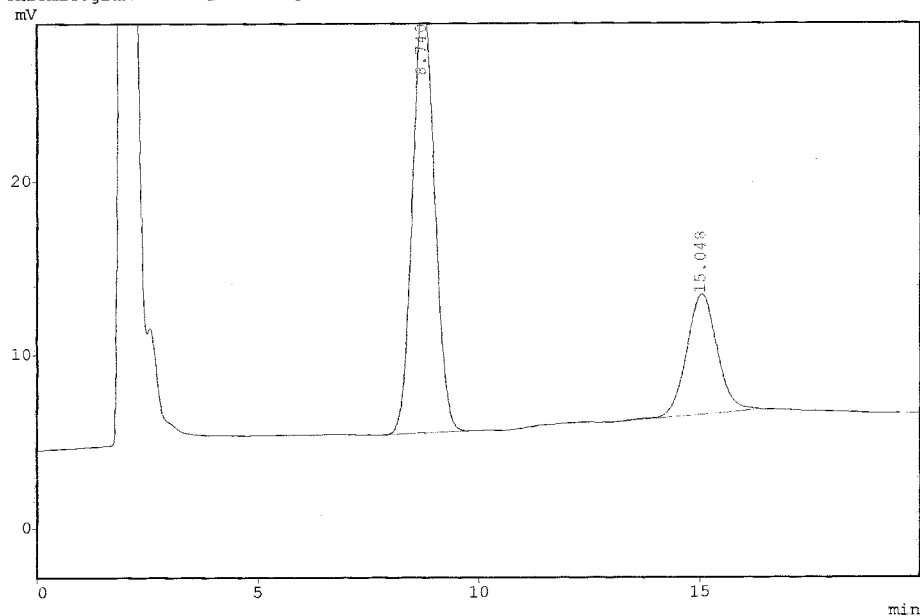

\*\*\* Peak Report \*\*\*

| PKNO | TIME   | AREA    | HEIGHT | MK | IDNO | CONC     | NAME |
|------|--------|---------|--------|----|------|----------|------|
| 1    | 8.740  | 870781  | 25029  |    |      | 72.4038  |      |
| 2    | 15.048 | 331892  | 6934   |    |      | 27.5962  |      |
|      |        | 1202673 | 31963  |    |      | 100.0000 |      |

Conc. of Styrene oxide / Conc. of PhBr = 0.38

# Supplementary Material (ESI) for New Journal of Chemistry  
# This journal is © The Royal Society of Chemistry and  
# The Centre National de la Recherche Scientifique, 2004

B) 75 mg of Styrene oxide + 75 mg of PhBr in 10 ml Ether.

CLASS-GC10 Ver.=1.62 SYS=1 Ch=1 REPORT.NO=2 DATA=ST75R.D13 04/01/25 10:32:44  
Sample :  
ID :  
Dilution Factor: 1  
Type : Unknown  
Detector : FID  
Operator :

\*\*\* Chromatogram \*\*\* Filename:@CHRM1.C13

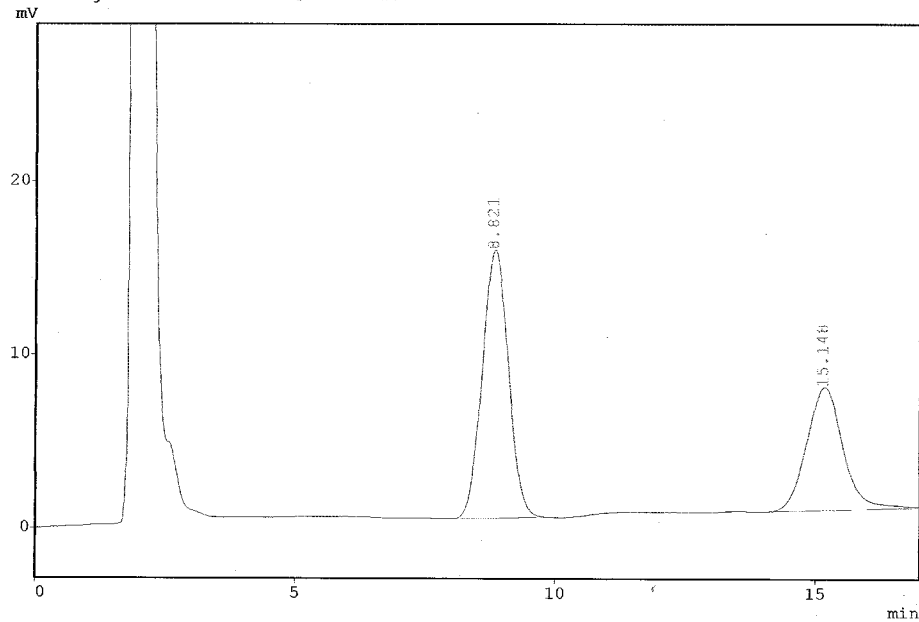

\*\*\* Peak Report \*\*\*

| PKNO | TIME   | AREA   | HEIGHT | MK | IDNO | CONC    | NAME |
|------|--------|--------|--------|----|------|---------|------|
| 1    | 8.821  | 541841 | 15468  |    |      | 61.1485 |      |
| 2    | 15.148 | 344266 | 7078   |    |      | 38.8515 |      |

---

|  |  |        |       |  |  |          |  |
|--|--|--------|-------|--|--|----------|--|
|  |  | 886107 | 22545 |  |  | 100.0000 |  |
|--|--|--------|-------|--|--|----------|--|

Conc. of Styrene oxide / Conc. of PhBr = 0.57

# Supplementary Material (ESI) for New Journal of Chemistry  
# This journal is © The Royal Society of Chemistry and  
# The Centre National de la Recherche Scientifique, 2004

C) 100 mg of Styrene oxide + 75 mg of PhBr in 10 ml Ether.

CLASS-GC10 Ver.=1.62 SYS=1 Ch=1 REPORT.NO=6 DATA=ST100.D09 04/01/25 08:37:42  
Sample :  
ID :  
Dilution Factor: 1  
Type : Unknown  
Detector : FID  
Operator :

\*\*\* Chromatogram \*\*\* Filename:@CHRM1.C09  
mV

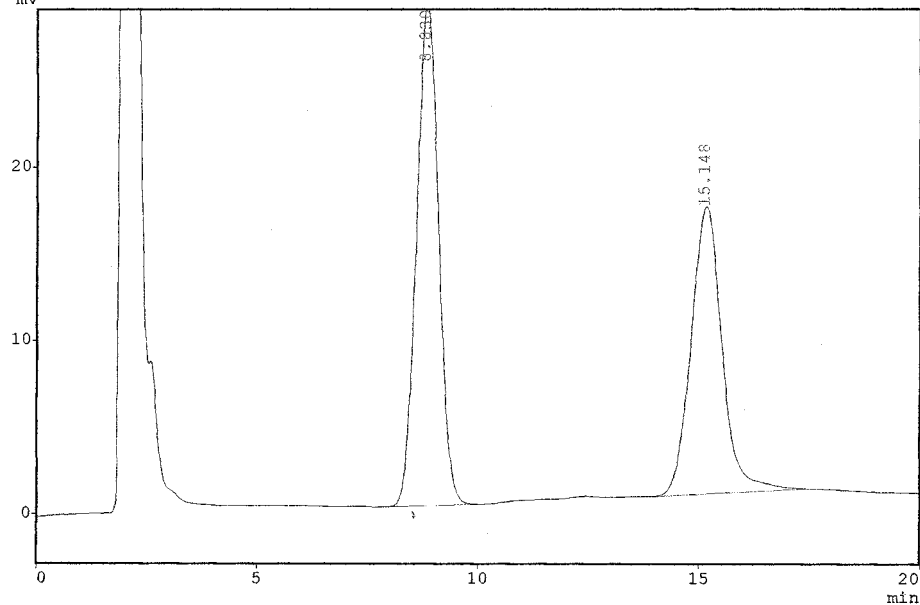

\*\*\* Peak Report \*\*\*

| PKNO | TIME   | AREA    | HEIGHT | MK | IDNO | CONC     | NAME |
|------|--------|---------|--------|----|------|----------|------|
| 1    | 8.830  | 1006086 | 28877  |    |      | 55.5075  |      |
| 2    | 15.148 | 806437  | 16536  |    |      | 44.4925  |      |
|      |        | 1812523 | 45413  |    |      | 100.0000 |      |

Conc. of Styrene oxide / Conc. of PhBr = 0.80

# Supplementary Material (ESI) for New Journal of Chemistry  
# This journal is © The Royal Society of Chemistry and  
# The Centre National de la Recherche Scientifique, 2004

D) 125 mg of Styrene oxide + 75 mg of PhBr in 10 ml Ether.

CLASS-GC10 Ver.=1.62 SYS=1 Ch=1 REPORT.NO=5 DATA=ST125.D10 04/01/25 09:10:04  
Sample :  
ID :  
Dilution Factor: 1  
Type : Unknown  
Detector : FID  
Operator :

\*\*\* Chromatogram \*\*\* Filename:@CHRM1.C10

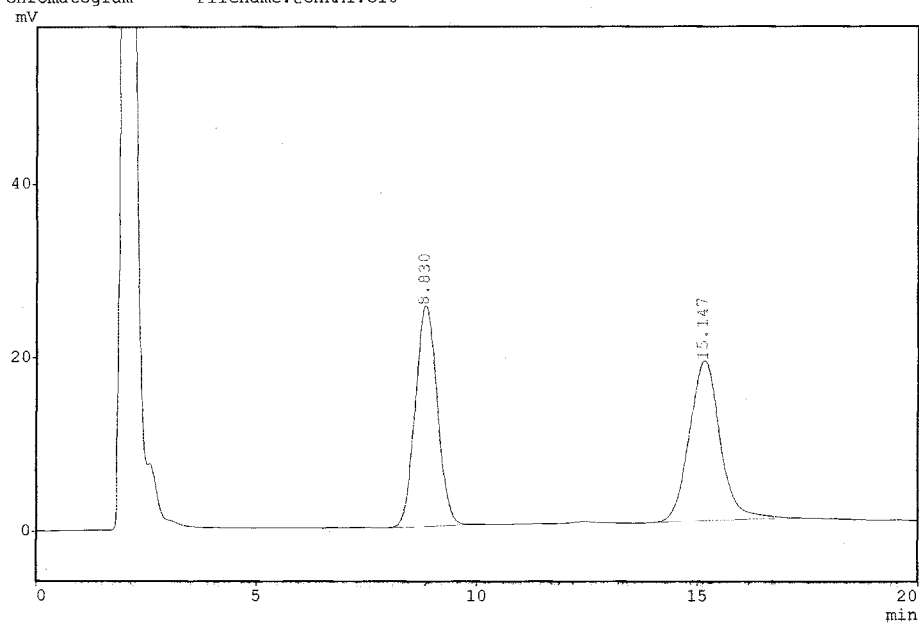

\*\*\* Peak Report \*\*\*

| PKNO | TIME   | AREA    | HEIGHT | MK | IDNO | CONC     | NAME |
|------|--------|---------|--------|----|------|----------|------|
| 1    | 8.830  | 883977  | 25428  |    |      | 49.6549  |      |
| 2    | 15.147 | 896266  | 18427  |    |      | 50.3451  |      |
|      |        | 1780243 | 43855  |    |      | 100.0000 |      |

Conc. of Styrene oxide / Conc. of PhBr = 1.01

# Supplementary Material (ESI) for New Journal of Chemistry  
# This journal is © The Royal Society of Chemistry and  
# The Centre National de la Recherche Scientifique, 2004

## GAS CHROMATOGRAM OF EPOXIDATION PRODUCT

Reaction product (**Unknown concentration of styrene oxide**) + 75 mg PhBr in 10 ml Ether.

CLASS-GC10 Ver.=1.62 SYS=1 Ch=1 REPORT.NO=10 DATA=STSTA2.D07 04/01/25 07:41:26  
Sample :  
ID :  
Dilution Factor: 1  
Type : Unknown  
Detector : FID  
Operator :

\*\*\* Chromatogram \*\*\* Filename:@CHRM1.C07

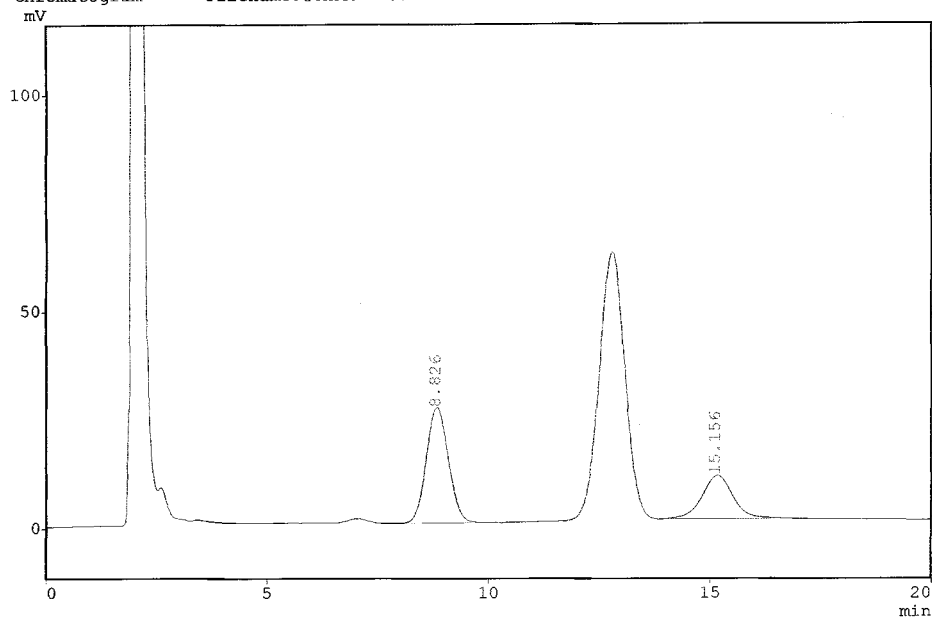

\*\*\* Peak Report \*\*\*

| PKNO | TIME   | AREA   | HEIGHT | MK | IDNO | CONC    | NAME |
|------|--------|--------|--------|----|------|---------|------|
| 1    | 8.826  | 922975 | 26552  |    |      | 65.0001 |      |
| 2    | 15.156 | 496985 | 10000  |    |      | 34.9999 |      |

-----  
1419960 36552 100.0000

Conc. of Styrene oxide / Conc. of PhBr = 0.54

LINEAR FIT OF STANDARD DATA TO FIND OUT UNKNOWN  
CONCENTRATION OF STYRENE OXIDE.

[CALIBRATION PLOT]

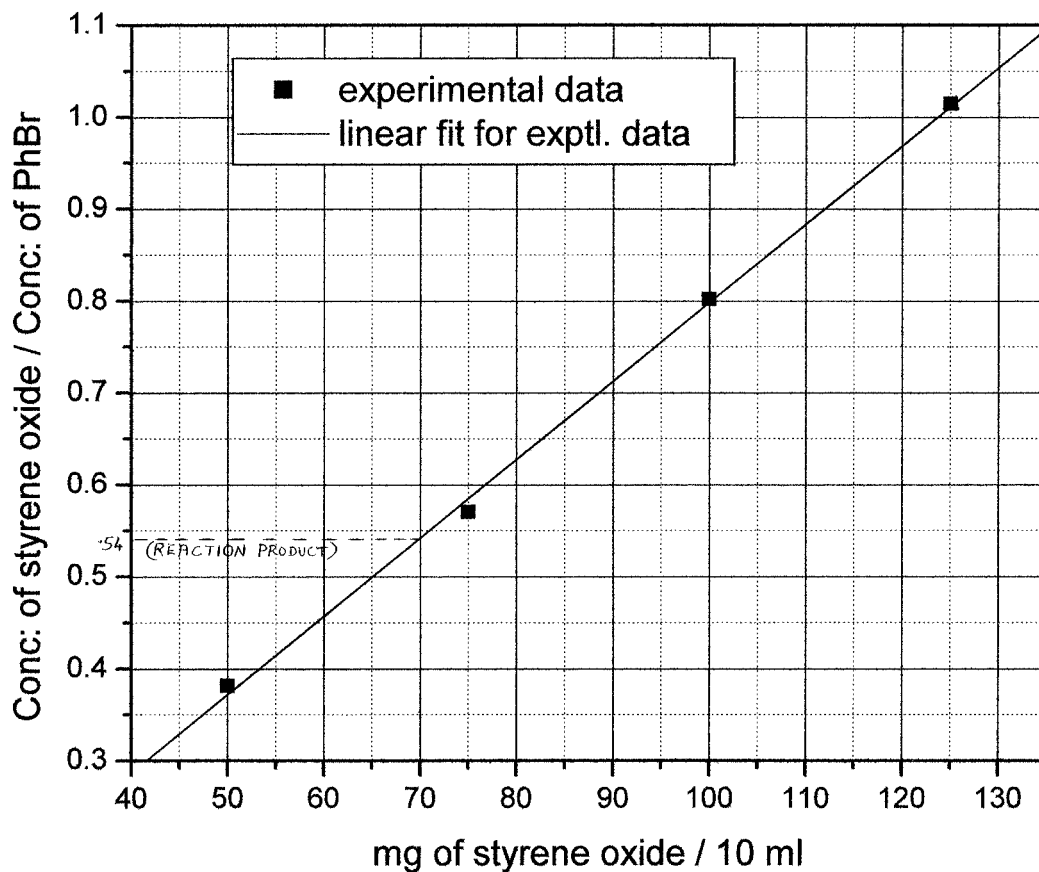

From the calibration plot, the concentration of styrene oxide formed in the reaction of styrene with PhIO, catalyzed by  $[\text{Mn}^{\text{IV}}\text{L}_2]$  1 was found to be 70 mg.

# Supplementary Material (ESI) for New Journal of Chemistry  
# This journal is © The Royal Society of Chemistry and  
# The Centre National de la Recherche Scientifique, 2004

**NMR Spectrum of (E)-Stilbene oxide isolated from the reaction of (E)-Stilbene with  
iodosobenzene catalyzed by 1 in MeCN**

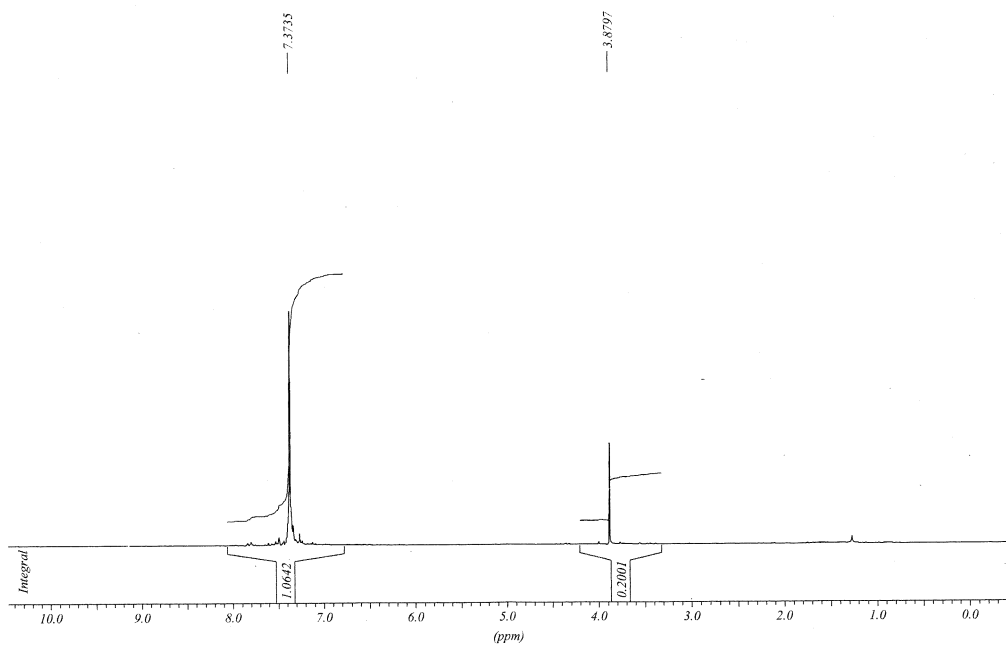

This spectrum (in CDCl<sub>3</sub>) shows  $\delta \sim 3.85$ , which is characteristic of (E)-stilbene oxide as reported earlier (reference 7 in the paper).
